# Supplementary material
Source: PubMed Central journal article supplement (PMC5764773)
Supplement: NIHMS931392-supplement-SI.pdf [file NIHMS931392-supplement-SI.pdf]

Supporting Information

**Multifunctional Copper-Containing Carboxymethyl  
Chitosan/Alginate Scaffolds for Eradicating Clinical Bacterial  
Infection and Promoting Bone Formation**

*Yao Lu,<sup>†,‡</sup> Lihua Li,<sup>‡</sup> Ye Zhu,<sup>§</sup> Xiaolan Wang,<sup>‡</sup> Mei Li,<sup>‡</sup> Zefeng Lin,<sup>‡</sup> Xiaoming Hu,<sup>†,‡</sup>*

*Yu Zhang,<sup>‡</sup> Qingshui Yin,<sup>\*,†,‡</sup> Hong Xia,<sup>\*,†,‡</sup>, and Chuanbin Mao<sup>\*,§,¶</sup>*

<sup>†</sup>Southern Medical University, No. 1023 Shatai Road, Guangzhou, Guangdong  
510515, China

<sup>‡</sup>Guangdong Key Lab of Orthopaedic Technology and Implant materials, Key  
Laboratory of Trauma & Tissue Repair of Tropical Area of PLA, Department of  
Orthopedics, Guangzhou General Hospital of Guangzhou Military Command, No. 111  
Lihua Road, Guangzhou, Guangdong 510010, China

<sup>§</sup>Department of Chemistry and Biochemistry, Stephenson Life Sciences Research  
Center, University of Oklahoma, Norman, OK 73072, USA

<sup>¶</sup>School of Materials Science and Engineering, Zhejiang University, Hangzhou 310027,  
China

**1. Morphology of the scaffolds made with Cu<sup>2+</sup> ions alone (CMC/Alg/Cu ions scaffold) observed by SEM.**

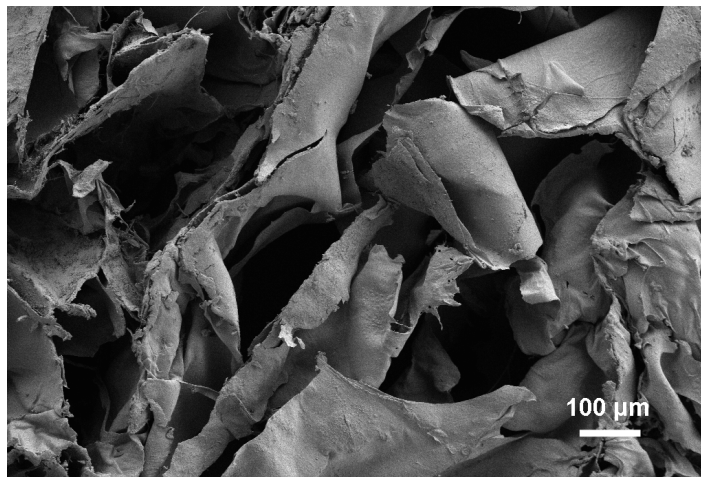

**Figure S1:** SEM image of the CMC/Alg/Cu ions scaffold.

**2. Cytotoxicity of the CMC/Alg/Cu ions scaffolds.**

Cell proliferation in the scaffolds made with Cu<sup>2+</sup> ions (1 mmol/L CuSO<sub>4</sub> solution) alone was determined by standard 3-(4, 5-dimethylthiazole-2-yl)-2, 5-diphenyl tetrazolium (MTT) assay. CMC/Alg/Cu ions scaffolds weighing 10 mg were placed in the plates. A 500 μL suspension of MC3T3-E1 cells with a concentration of  $2 \times 10^5$  cells/mL were seeded and incubated with the scaffolds at 37 °C in the  $\alpha$ -Minimum Essential Medium ( $\alpha$ -MEM, Gibco), supplemented with 10% fetal bovine serum (FBS, Gibco). After cultured for 1 day, the media were discarded. 500 μL of the MTT solution (0.05%) was added to each well, and incubated for 4 h. 500 μL of DMSO was used to dissolve the formazan crystals, and optical densities (OD) were determined at 490 nm using a microplate reader (Multiskan GO, Thermo Scientific). Each experiment was performed in triplicate.

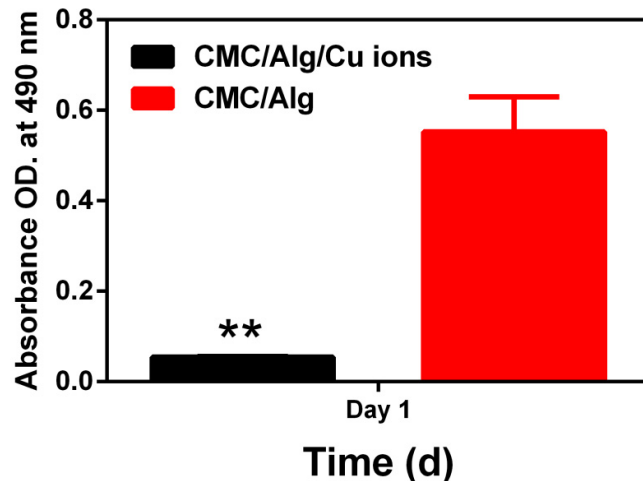

**Figure S2:** Cytotoxicity of the CMC/Alg/Cu ions scaffolds. Cell proliferation in the scaffolds was measured by a standard MTT assay. Significant inhibition of cell proliferation was observed in the CMC/Alg/Cu ions (1 mmol/L) scaffolds after 1 day of culture. Each value is the mean  $\pm$  standard deviation of triplicate determinations; \*\* $p < 0.01$  compared with CMC/Alg scaffolds.

### 3. Cytotoxicity of the Cu-containing CMC/Alg scaffolds made with different concentrations of Cu nanoparticles

Cell proliferation in the scaffolds made with different concentrations of Cu nanoparticles (10 mmol/L, 1 mmol/L, 0.1 mmol/L, and 0.01 mmol/L, respectively) was determined by a standard MTT assay. Scaffolds weighing 10 mg were co-cultured with 500  $\mu$ L cell suspension in the concentration of  $2 \times 10^5$  cells/mL. After cultured for 1 and 7 days, the standard MTT assay was performed as described above. Each experiment was performed in triplicate.

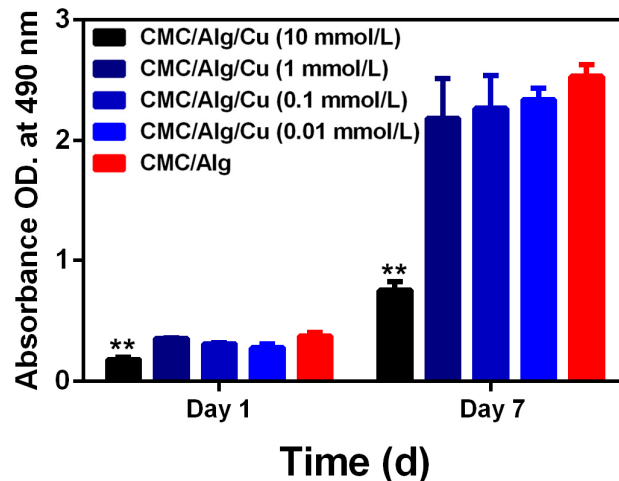

**Figure S3:** Cytotoxicity of the scaffolds with different concentrations of Cu nanoparticles. Cell proliferation in the scaffolds was measured by a standard MTT assay. Significant reductions were observed in the CMC/Alg/Cu (10 mmol/L) scaffolds on day 1 and 7. Each value is the mean  $\pm$  standard deviation of triplicate determinations; \*\* $p < 0.01$  compared with CMC/Alg scaffolds.

#### 4. *In vitro* antibacterial property

*Staphylococcus aureus* (*S. aureus*) was used to evaluate the *in vitro* antibacterial properties of scaffolds with different concentrations of Cu nanoparticles. After cultivated in lysogeny broth (LB) medium (1% w/v tryptone, 0.3% w/v yeast extract, and 0.5% w/v NaCl<sub>2</sub>) under shaking at 200 rpm at 37 °C for 12 h, the bacteria with the concentration of  $2 \times 10^6$  CFU/mL were used in an antibacterial assay. 10 mg of each scaffold was introduced to 500  $\mu$ L of bacteria suspension. The resultant suspension was incubated in a biochemical incubator at 37 °C for 24 h. The viable number of bacteria in the PBS was quantified by standard serial dilution. A culture suspension of 100  $\mu$ L from each tube was uniformly spread on the LB agar plates, and the number of viable bacterial colonies was counted after incubation at 37 °C for 24 h.

The antibacterial rate was determined by using the formula (1).

$$\text{Antibacterial rate (\%)} = (N_{\text{control}} - N_{\text{scaffold}}) / N_{\text{control}} \times 100 \quad (1)$$

In Equation 1,  $N_{\text{control}}$  is the average number of bacteria in the control groups. (CFU/sample), and  $N_{\text{scaffold}}$  is the average number of bacteria in the scaffold groups (CFU/sample).

Each experiment was performed in triplicate.

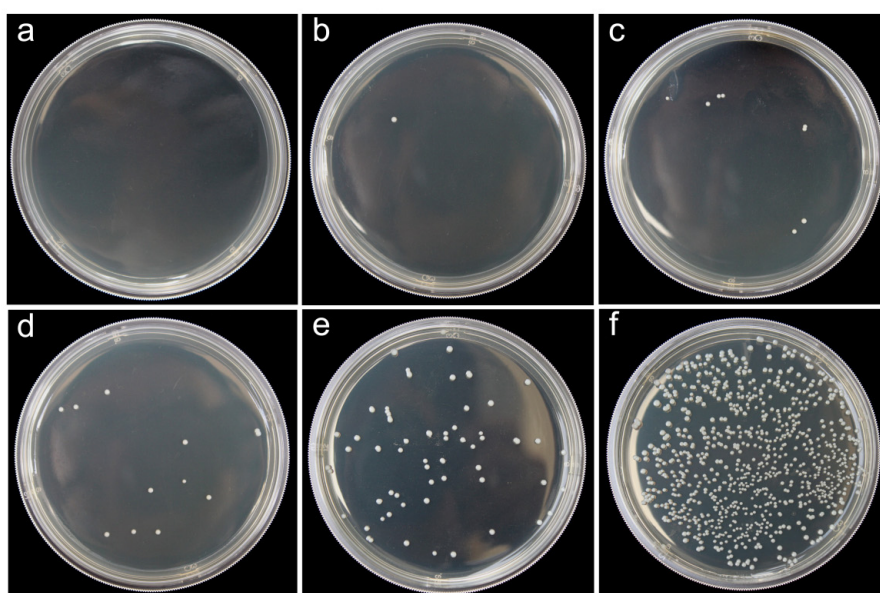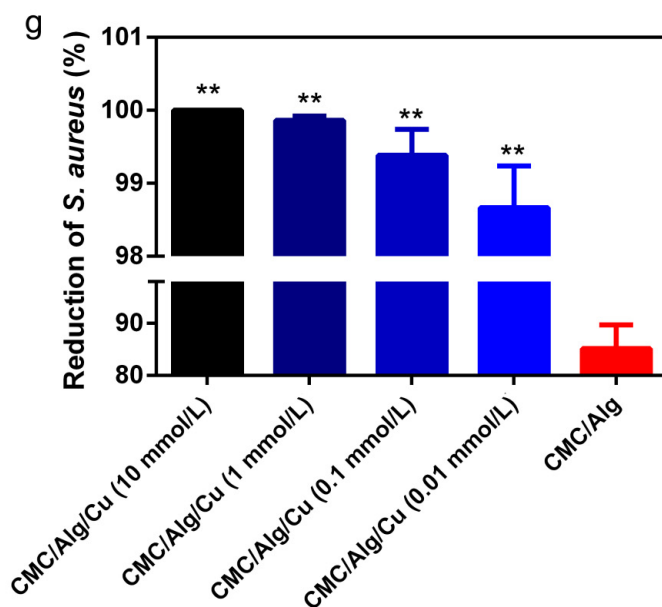

**Figure S4:** *In vitro* antibacterial property of the CMC/Alg/Cu scaffolds made with different concentrations of Cu nanoparticles. (a-f) Numbers of *S. aureus* colonies in the CMC/Alg/Cu with a Cu nanoparticle concentration of 10 mmol/L (a), 1 mmol/L (b), 0.1 mmol/L (c), 0.01 mmol/L (d), CMC/Alg scaffolds (e), and control (saline) group (f); (g) The antibacterial rate of these scaffolds. After the addition of the Cu nanoparticles into the CMC/Alg scaffolds, the antibacterial property was significantly enhanced. Each value is the mean  $\pm$  standard deviation of triplicate determinations; \*\*p < 0.01 compared with CMC/Alg scaffolds.
